# Supplementary material for: Comparative Analysis of Nutritional Quality, Serum Biochemical Indices, and Visceral Peritoneum of Grass Carp (Ctenopharyngodon idellus) Fed with Two Distinct Aquaculture Systems
Source: MDPI journal article supplement (doi:10.3390/foods13081248), 2024-04-19
Supplement: s1 [file s1]

**Table S1.** Qualitative results of gas phase ion mobility spectra of *Ctenopharyngodon idellus* muscle under different aquaculture conditions (n=6).

| Count | Compound                | CAS#      | Formula                                       | MW    | RI     | Rt [sec] | Dt [a.u.] | Peak intensity  |                | Comment |
|-------|-------------------------|-----------|-----------------------------------------------|-------|--------|----------|-----------|-----------------|----------------|---------|
|       |                         |           |                                               |       |        |          |           | TPI             | IPRS           |         |
| 1     | Nonanal-M               | C124196   | C <sub>9</sub> H <sub>18</sub> O              | 142.2 | 1101.8 | 503.541  | 1.47535   | 875.28±274.70   | 1269.59±115.73 | Monomer |
| 2     | 2-ethyl-1-hexanol-M     | C104767   | C <sub>8</sub> H <sub>18</sub> O              | 130.2 | 1029   | 390.54   | 1.41406   | 987.80±117.80** | 418.18±29.20   | Monomer |
| 3     | 2-ethyl-1-hexanol-D     | C104767   | C <sub>8</sub> H <sub>18</sub> O              | 130.2 | 1028.6 | 390.073  | 1.8056    | 252.41±51.35**  | 58.30±6.80     | Dimer   |
| 4     | Octanal-M               | C124130   | C <sub>8</sub> H <sub>16</sub> O              | 128.2 | 1001.6 | 355.051  | 1.40726   | 374.18±147.10*  | 652.10±46.91   | Monomer |
| 5     | 2-furanmethanol acetate | C623176   | C <sub>7</sub> H <sub>8</sub> O <sub>3</sub>  | 140.1 | 983.4  | 336.449  | 1.4186    | 99.70±10.03**   | 568.91±8.37    |         |
| 6     | methyl-5-hepten-2-one   | C110930   | C <sub>8</sub> H <sub>14</sub> O              | 126.2 | 984.7  | 337.606  | 1.17789   | 37.50±7.54      | 31.62±1.11     |         |
| 7     | 5-Methylfurfural        | C620020   | C <sub>6</sub> H <sub>6</sub> O <sub>2</sub>  | 110.1 | 979.1  | 332.54   | 1.13071   | 151.34±17.86*   | 105.46±0.00    |         |
| 8     | 1-Octen-3-ol-M          | C3391864  | C <sub>8</sub> H <sub>16</sub> O              | 128.2 | 976.6  | 330.242  | 1.1602    | 80.33±22.50**   | 582.46±24.93   | Monomer |
| 9     | Propyl isovalerate      | C557006   | C <sub>8</sub> H <sub>16</sub> O <sub>2</sub> | 144.2 | 945.5  | 303.344  | 1.34838   | 191.50±22.47**  | 61.24±6.26     |         |
| 10    | 2-Octanone              | C111137   | C <sub>8</sub> H <sub>16</sub> O              | 128.2 | 990.1  | 342.656  | 1.33575   | 73.85±39.71     | 44.40±1.48     |         |
| 11    | 3-Octanone              | C106683   | C <sub>8</sub> H <sub>16</sub> O              | 128.2 | 983.6  | 336.641  | 1.30562   | 28.87±6.93      | 31.61±6.55     |         |
| 12    | 1-heptanol              | C111706   | C <sub>7</sub> H <sub>16</sub> O              | 116.2 | 970.4  | 324.724  | 1.40456   | 56.88±22.61     | 76.42±5.93     |         |
| 13    | Benzaldehyde            | C100527   | C <sub>7</sub> H <sub>6</sub> O               | 106.1 | 954.3  | 310.701  | 1.15318   | 59.35±15.00**   | 231.38±11.99   |         |
| 14    | Nonanal-D               | C124196   | C <sub>9</sub> H <sub>18</sub> O              | 142.2 | 1101.2 | 502.415  | 1.94619   | 68.81±31.39*    | 142.71±24.07   | Dimer   |
| 15    | (E)-2-octenal           | C2548870  | C <sub>8</sub> H <sub>14</sub> O              | 126.2 | 1054.1 | 426.359  | 1.33268   | 28.53±9.45**    | 200.70±12.25   |         |
| 16    | benzene acetaldehyde    | C122781   | C <sub>8</sub> H <sub>8</sub> O               | 120.2 | 1026.1 | 386.622  | 1.26488   | 46.30±3.10**    | 125.80±9.22    |         |
| 17    | Octanal-D               | C124130   | C <sub>8</sub> H <sub>16</sub> O              | 128.2 | 1001.3 | 354.576  | 1.82713   | 53.87±17.60**   | 182.53±33.82   | Dimer   |
| 18    | (E)-hept-2-enal-M       | C18829555 | C <sub>7</sub> H <sub>12</sub> O              | 112.2 | 949.1  | 306.293  | 1.25827   | 53.55±14.45**   | 369.34±25.96   | Monomer |
| 19    | (E)-hept-2-enal-D       | C18829555 | C <sub>7</sub> H <sub>12</sub> O              | 112.2 | 950.1  | 307.176  | 1.67129   | 12.76±6.09**    | 73.74±9.12     | Dimer   |

|    |                       |          |                                              |       |       |         |         |                 |                |         |
|----|-----------------------|----------|----------------------------------------------|-------|-------|---------|---------|-----------------|----------------|---------|
| 20 | 1-Octen-3-ol-D        | C3391864 | C <sub>8</sub> H <sub>16</sub> O             | 128.2 | 976.6 | 330.276 | 1.6026  | 15.32±9.26**    | 179.50±23.35   | Dimer   |
| 21 | Heptanal-M            | C111717  | C <sub>7</sub> H <sub>14</sub> O             | 114.2 | 890.8 | 261.245 | 1.33439 | 374.37±116.58*  | 589.61±60.12   | Monomer |
| 22 | Heptanal-D            | C111717  | C <sub>7</sub> H <sub>14</sub> O             | 114.2 | 891.2 | 261.513 | 1.69582 | 73.25±39.03**   | 531.93±52.54   | Dimer   |
| 23 | 2-heptanone-M         | C110430  | C <sub>7</sub> H <sub>14</sub> O             | 114.2 | 880.7 | 255.067 | 1.26243 | 182.24±92.93    | 225.35±11.30   | Monomer |
| 24 | n-Hexanol-M           | C111273  | C <sub>6</sub> H <sub>14</sub> O             | 102.2 | 861.2 | 243.517 | 1.32948 | 499.63±132.02*  | 906.44±103.53  | Monomer |
| 25 | n-Hexanol-D           | C111273  | C <sub>6</sub> H <sub>14</sub> O             | 102.2 | 859.4 | 242.442 | 1.64185 | 86.07±41.34**   | 472.77±45.52   | Dimer   |
| 26 | Hexanal-M             | C66251   | C <sub>6</sub> H <sub>12</sub> O             | 100.2 | 788.1 | 204.67  | 1.26433 | 812.03±126.24** | 1222.90±57.54  | Monomer |
| 27 | Hexanal-D             | C66251   | C <sub>6</sub> H <sub>12</sub> O             | 100.2 | 782.3 | 201.895 | 1.55866 | 899.61±333.41** | 4556.41±152.47 | Dimer   |
| 28 | pentan-1-ol-M         | C71410   | C <sub>5</sub> H <sub>12</sub> O             | 88.1  | 754   | 189.564 | 1.25682 | 238.98±71.41**  | 763.48±53.44   | Monomer |
| 29 | 2-Hexanone            | C591786  | C <sub>6</sub> H <sub>12</sub> O             | 100.2 | 767.6 | 195.422 | 1.18924 | 122.86±30.18    | 131.19±10.86   |         |
| 30 | Pentanal-M            | C110623  | C <sub>5</sub> H <sub>10</sub> O             | 86.1  | 678.7 | 160.895 | 1.19375 | 419.90±18.63**  | 840.17±62.03   | Monomer |
| 31 | 2-Pentanone-M         | C107879  | C <sub>5</sub> H <sub>10</sub> O             | 86.1  | 665.5 | 157.049 | 1.12175 | 141.73±6.50**   | 18.70±2.39     | Monomer |
| 32 | 2-Pentanone-D         | C107879  | C <sub>5</sub> H <sub>10</sub> O             | 86.1  | 666.8 | 157.437 | 1.36984 | 136.65±10.81*   | 105.74±10.06   | Dimer   |
| 33 | 2-methyl-1-propanol-D | C78831   | C <sub>4</sub> H <sub>10</sub> O             | 74.1  | 604.1 | 140.34  | 1.3646  | 234.62±7.65**   | 62.07±6.41     | Dimer   |
| 34 | 2-butanone-D          | C78933   | C <sub>4</sub> H <sub>8</sub> O              | 72.1  | 556.8 | 128.683 | 1.24492 | 1034.70±81.76   | 1217.82±99.34  | Dimer   |
| 35 | Acetoxyacetone        | C592201  | C <sub>5</sub> H <sub>8</sub> O <sub>3</sub> | 116.1 | 515.2 | 119.228 | 1.19425 | 228.53±9.98**   | 129.38±14.49   |         |
| 36 | Ethanol               | C64175   | C <sub>2</sub> H <sub>6</sub> O              | 46.1  | 389.1 | 94.619  | 1.13223 | 1478.72±85.66** | 48.16±5.23     |         |
| 37 | 2-Propanone           | C67641   | C <sub>3</sub> H <sub>6</sub> O              | 58.1  | 464.3 | 108.607 | 1.11738 | 1858.74±339.45  | 1135.62±337.14 |         |
| 38 | 2-methylbutanal-M     | C96173   | C <sub>5</sub> H <sub>10</sub> O             | 86.1  | 642.5 | 150.572 | 1.16542 | 66.25±4.97*     | 76.82±3.75     | Monomer |
| 39 | 3-methylbutanal-M     | C590863  | C <sub>5</sub> H <sub>10</sub> O             | 86.1  | 633   | 147.982 | 1.18552 | 462.56±4.95*    | 505.53±20.98   | Monomer |
| 40 | 2-methylbutanal-D     | C96173   | C <sub>5</sub> H <sub>10</sub> O             | 86.1  | 645.3 | 151.35  | 1.38818 | 42.41±1.76      | 40.43±6.29     | Dimer   |
| 41 | 3-methylbutanal-D     | C590863  | C <sub>5</sub> H <sub>10</sub> O             | 86.1  | 634.5 | 148.371 | 1.40129 | 50.44±1.91      | 49.48±6.95     | Dimer   |

|    |                       |          |                                              |       |       |         |         |                |               |         |
|----|-----------------------|----------|----------------------------------------------|-------|-------|---------|---------|----------------|---------------|---------|
| 42 | 2-methylbutan-1-ol    | C137326  | C <sub>5</sub> H <sub>12</sub> O             | 88.1  | 719.9 | 175.7   | 1.23444 | 17.24±1.56*    | 13.12±1.75    |         |
| 43 | 3-methylbutan-1-ol    | C123513  | C <sub>5</sub> H <sub>12</sub> O             | 88.1  | 719.6 | 175.57  | 1.24841 | 18.08±2.48*    | 10.58±2.63    |         |
| 44 | 2-heptanone-D         | C110430  | C <sub>7</sub> H <sub>14</sub> O             | 114.2 | 879   | 254.012 | 1.63564 | 44.81±26.05**  | 192.53±35.96  | Dimer   |
| 45 | Cyclohexanone         | C108941  | C <sub>6</sub> H <sub>10</sub> O             | 98.1  | 886.8 | 258.765 | 1.14712 | 25.22±4.02**   | 70.71±2.49    |         |
| 46 | (E)-2-hexenal-M       | C6728263 | C <sub>6</sub> H <sub>10</sub> O             | 98.1  | 837.7 | 230.246 | 1.1818  | 86.29±13.80**  | 277.70±6.73   | Monomer |
| 47 | (E)-2-hexenal-D       | C6728263 | C <sub>6</sub> H <sub>10</sub> O             | 98.1  | 837.1 | 229.929 | 1.51653 | 8.36±4.31**    | 75.65±13.03   | Dimer   |
| 48 | (E)-2-pentenal-M      | C1576870 | C <sub>5</sub> H <sub>8</sub> O              | 84.1  | 738.3 | 183.032 | 1.10792 | 46.74±8.21**   | 304.58±14.91  | Monomer |
| 49 | (E)-2-pentenal-D      | C1576870 | C <sub>5</sub> H <sub>8</sub> O              | 84.1  | 735.9 | 182.067 | 1.36207 | 9.69±5.76**    | 177.72±24.76  | Dimer   |
| 50 | Pentanal-D            | C110623  | C <sub>5</sub> H <sub>10</sub> O             | 86.1  | 679.2 | 161.059 | 1.42377 | 96.69±14.79**  | 1741.68±45.54 | Dimer   |
| 51 | Propanoic acid        | C79094   | C <sub>3</sub> H <sub>6</sub> O <sub>2</sub> | 74.1  | 701.5 | 168.629 | 1.10679 | 35.37±4.44**   | 57.18±3.68    |         |
| 52 | pentan-1-ol-D         | C71410   | C <sub>5</sub> H <sub>12</sub> O             | 88.1  | 752.5 | 188.921 | 1.51941 | 63.83±16.58**  | 856.41±67.64  | Dimer   |
| 53 | 2-methyl-1-propanol-M | C78831   | C <sub>4</sub> H <sub>10</sub> O             | 74.1  | 602.7 | 139.973 | 1.17507 | 632.36±6.44**  | 418.71±29.31  | Monomer |
| 54 | 2-butanone-M          | C78933   | C <sub>4</sub> H <sub>8</sub> O              | 72.1  | 558.5 | 129.081 | 1.0586  | 706.07±6.03*   | 913.81±88.89  | Monomer |
| 55 | pent-1-en-3-ol        | C616251  | C <sub>5</sub> H <sub>10</sub> O             | 86.1  | 658.7 | 155.1   | 0.94588 | 135.76±18.95** | 826.70±28.53  |         |

\* indicates a significant difference ( $p < 0.05$ ), \*\* indicates a highly significant difference ( $p < 0.01$ ). RI is retention index, Rt is retention time, Dt is migration time, [RIP rel] means normalization.
